# Supplementary material for: Biological Responses to Cadmium Stress in Liverwort Conocephalum conicum (Marchantiales)
Source: PubMed Central journal article supplement (PMC7555243; doi:10.3390/ijms21186485), 2020-09-04
Supplement: ijms-21-06485-s001.pdf [file ijms-21-06485-s001.pdf]

|                   | Cd CTR       | Cd 36 $\mu$ M | Cd 360 $\mu$ M | Hsp70 CTR   | Hsp70 36 $\mu$ M | Hsp70 360 $\mu$ M | ROS CTR     | ROS 36 $\mu$ M | ROS 360 $\mu$ M | GST CTR     | GST 36 $\mu$ M | GST 360 $\mu$ M | CAT CTR     | CAT 36 $\mu$ M | CAT 360 $\mu$ M | SOD CTR     | SOD 36 $\mu$ M | SOD 360 $\mu$ M |
|-------------------|--------------|---------------|----------------|-------------|------------------|-------------------|-------------|----------------|-----------------|-------------|----------------|-----------------|-------------|----------------|-----------------|-------------|----------------|-----------------|
| Cd CTR            | 1            |               |                |             |                  |                   |             |                |                 |             |                |                 |             |                |                 |             |                |                 |
| Cd 36 $\mu$ M     |              | 1             |                |             |                  |                   |             |                |                 |             |                |                 |             |                |                 |             |                |                 |
| Cd 360 $\mu$ M    | 0.314170333  |               | 1              |             |                  |                   |             |                |                 |             |                |                 |             |                |                 |             |                |                 |
| Hsp70 CTR         | -0.536115956 | 0.594288632   |                | 1           |                  |                   |             |                |                 |             |                |                 |             |                |                 |             |                |                 |
| Hsp70 36 $\mu$ M  | -0.526240498 | 0.600611212   | 0.999823477    |             | 1                |                   |             |                |                 |             |                |                 |             |                |                 |             |                |                 |
| Hsp70 360 $\mu$ M | -0.508225751 | 0.612653395   | 0.999226642    | 0.999714016 |                  | 1                 |             |                |                 |             |                |                 |             |                |                 |             |                |                 |
| ROS CTR           | -0.534052102 | 0.594964897   | 0.999817913    | 0.999928928 | 0.999388441      |                   | 1           |                |                 |             |                |                 |             |                |                 |             |                |                 |
| ROS 36 $\mu$ M    | -0.54904711  | 0.584344312   | 0.999673428    | 0.999509118 | 0.998482123      | 0.99979256        |             | 1              |                 |             |                |                 |             |                |                 |             |                |                 |
| ROS 360 $\mu$ M   | -0.50726321  | 0.614262158   | 0.998928763    | 0.998908466 | 0.999235575      | 0.998354935       | 0.997444961 |                | 1               |             |                |                 |             |                |                 |             |                |                 |
| GST CTR           | -0.701320062 | 0.44277062    | 0.96552245     | 0.963123239 | 0.956584439      | 0.966173372       | 0.97105005  | 0.952954296    |                 | 1           |                |                 |             |                |                 |             |                |                 |
| GST 36 $\mu$ M    | -0.515814003 | 0.608464682   | 0.999549936    | 0.999559807 | 0.999616055      | 0.999196876       | 0.998506646 | 0.999850404    | 0.957351002     |             | 1              |                 |             |                |                 |             |                |                 |
| GST 360 $\mu$ M   | -0.524365085 | 0.60245334    | 0.99987342     | 0.999878683 | 0.999660005      | 0.999695375       | 0.999230457 | 0.999457688    | 0.961325658     | 0.999876974 |                | 1               |             |                |                 |             |                |                 |
| CAT CTR           | -0.604176685 | 0.534267523   | 0.990358232    | 0.990171379 | 0.987178032      | 0.991747494       | 0.993573301 | 0.982985751    | 0.988389151     | 0.98598408  | 0.988476847    |                 | 1           |                |                 |             |                |                 |
| CAT 36 $\mu$ M    | -0.544429007 | 0.588908827   | 0.999371544    | 0.998593711 | 0.997730753      | 0.99852614        | 0.998635446 | 0.998728372    | 0.965184084     | 0.999035488 | 0.999127732    | 0.987646815     |             | 1              |                 |             |                |                 |
| CAT 360 $\mu$ M   | -0.52957362  | 0.599236394   | 0.998861249    | 0.998162609 | 0.997776098      | 0.997811915       | 0.997526538 | 0.999325454    | 0.958735948     | 0.999233802 | 0.998955648    | 0.983877016     | 0.999713811 |                | 1               |             |                |                 |
| SOD CTR           | -0.414744332 | 0.667779095   | 0.987830452    | 0.989561545 | 0.992685207      | 0.987857982       | 0.984560954 | 0.992982728    | 0.914416889     | 0.991730221 | 0.99017607     | 0.96190535      | 0.985759098 | 0.988458553    |                 | 1           |                |                 |
| SOD 36 $\mu$ M    | -0.526558096 | 0.60139409    | 0.999552895    | 0.999180537 | 0.998895327      | 0.998891838       | 0.998503838 | 0.999671232    | 0.95983414      | 0.99979303  | 0.999679471    | 0.986040139     | 0.999685226 | 0.999791073    | 0.989635863     |             | 1              |                 |
| SOD 360 $\mu$ M   | -0.543368999 | 0.588614893   | 0.999847793    | 0.999732168 | 0.998893029      | 0.999910764       | 0.999961318 | 0.998023205    | 0.968963668     | 0.998944554 | 0.999536027    | 0.992580264     | 0.998854668 | 0.997954441    | 0.985987063     | 0.998886566 |                | 1               |

**Table S1.** The table shows the correlation in the three different conditions, control, Cd 36  $\mu$ M and Cd 360  $\mu$ M, between cadmium accumulation, Hsp70 gene expression, antioxidant enzymes and ROS level. ( $n=3$ )
